# Supplementary material for: Physicochemical studies toward the removal of Zn(ii) and Pb(ii) ions through adsorption on montmorillonite-supported zero-valent iron nanoparticles
Source: Royal Society of Chemistry journal article supplement (doi:10.1039/c5ra02108a), 2015-01-01
Supplement: c5ra02108a1.pdf [file c5ra02108a1.pdf]

**Chemical composition of supporting material**

| <b>mass fraction, %</b> |                                    |            |             |                       |                                    |                        |                        |              |                       |                                   |              |
|-------------------------|------------------------------------|------------|-------------|-----------------------|------------------------------------|------------------------|------------------------|--------------|-----------------------|-----------------------------------|--------------|
| <b>SiO<sub>2</sub></b>  | <b>Al<sub>2</sub>O<sub>3</sub></b> | <b>CaO</b> | <b>MgO</b>  | <b>K<sub>2</sub>O</b> | <b>Fe<sub>2</sub>O<sub>3</sub></b> | <b>Na<sub>2</sub>O</b> | <b>TiO<sub>2</sub></b> | <b>MnO</b>   | <b>SO<sub>3</sub></b> | <b>P<sub>2</sub>O<sub>5</sub></b> | <b>Total</b> |
| <b>74.55</b>            | <b>14.55</b>                       | <b>2.4</b> | <b>2.32</b> | <b>1.54</b>           | <b>0.52</b>                        | <b>0.28</b>            | <b>0.118</b>           | <b>0.064</b> | <b>0.02</b>           | <b>0.002</b>                      | <b>96.35</b> |
